# Supplementary material
Source: PubMed Central journal article supplement (PMC5373053)
Supplement: supp_pp.16.00116_PP2016-01665D_Supplemental_Tables.pdf [file supp_pp.16.00116_PP2016-01665D_Supplemental_Tables.pdf]

Supplemental Table 1. HMR peptides identified by LC-MS/MS analysis.

| Sequence                                | Prob | Start | Stop |
|-----------------------------------------|------|-------|------|
| (C)KKEDGDGDVSEGSKKSEEGFE(Y)             | 95%  | 58    | 78   |
| (E)YVTVER(H)                            | 50%  | 79    | 84   |
| (E)RHPYHSYmD(S)                         | 96%  | 84    | 92   |
| (E)RHPYHSYMD(S)                         | 92%  | 84    | 92   |
| (E)RHPYHSYmD(S)                         | 17%  | 84    | 92   |
| (E)RHPYHSYmDSTSGKLEPASG(A)              | 82%  | 84    | 103  |
| (E)RHPYHSYMDSTSGKLEPASG(A)              | 60%  | 84    | 103  |
| (E)RHPYHSYmDSTSGKLEPASGAR(A)            | 100% | 84    | 105  |
| (E)RHPYHSYmDSTSGKLEPASGAR(A)            | 100% | 84    | 105  |
| (E)RHPYHSYmDSTSGKLEPASGAR(A)            | 100% | 84    | 105  |
| (E)RHPYHSYMDSTSGKLEPASGAR(A)            | 100% | 84    | 105  |
| (E)RHPYHSYmDSTSGKLEPASGAR(A)            | 100% | 84    | 105  |
| (E)RHPYHSYmDSTSGKLEPASGAR(A)            | 98%  | 84    | 105  |
| (E)RHPYHSYMDSTSGKLEPASGAR(A)            | 95%  | 84    | 105  |
| (E)RHPYHSYMDSTSGKLEPASGAR(A)            | 56%  | 84    | 105  |
| (E)RHPYHSYMDSTSGKLEPASGARASIPGE(D)      | 11%  | 84    | 111  |
| (E)RHPYHSYMDSTSGKLEPASGARASIPGEDYWPE(G) | 93%  | 84    | 116  |
| (E)RHPYHSYMDSTSGKLEPASGARASIPGEDYWPE(G) | 87%  | 84    | 116  |
| (E)RHPYHSYmDSTSGKLEPASGARASIPGEDYWPE(G) | 74%  | 84    | 116  |
| (E)RHPYHSYMDSTSGKLEPASGARASIPGEDYWPE(G) | 53%  | 84    | 116  |
| (E)RHPYHSYmDSTSGKLEPASGARASIPGEDYWPE(G) | 49%  | 84    | 116  |
| (E)RHPYHSYMDSTSGKLEPASGARASIPGEDYWPE(G) | 45%  | 84    | 116  |
| (E)RHPYHSYMDSTSGKLEPASGARASIPGEDYWPE(G) | 28%  | 84    | 116  |
| (E)RHPYHSYmDSTSGKLEPASGARASIPGEDYWPE(G) | 28%  | 84    | 116  |
| (E)RHPYHSYMDSTSGKLEPASGARASIPGEDYWPE(G) | 9%   | 84    | 116  |
| (H)SYmDSTSGKLEPASGARASIPGEDYWPE(G)      | 35%  | 89    | 116  |
| (D)STSGKLEPASGAR(A)                     | 99%  | 93    | 105  |
| (D)STSGKLEPASGAR(A)                     | 95%  | 93    | 105  |
| (D)STSGKLEPASGARASIPGEDYWPE(G)          | 77%  | 93    | 116  |
| (D)STSGKLEPASGARASIPGEDYWPE(G)          | 40%  | 93    | 116  |
| (S)GKLEPASGARASIPGEDYWPE(G)             | 35%  | 96    | 116  |
| (A)SGARASIPGEDYWPE(G)                   | 91%  | 102   | 116  |
| (S)GARASIPGEDYWPE(G)                    | 87%  | 103   | 116  |
| (G)ARASIPGEDYWPE(G)                     | 78%  | 104   | 116  |
| (G)ARASIPGEDYWPE(G)                     | 38%  | 104   | 116  |
| (R)ASIPGEDYWPE(G)                       | 47%  | 106   | 116  |
| (R)ASIPGEDYWPE(G)                       | 29%  | 106   | 116  |
| (E)GTSSRVRAARAPQPAGE(S)                 | 10%  | 117   | 133  |
| (R)VRAARAPQPAGE(S)                      | 100% | 122   | 133  |
| (R)VRAARAPQPAGE(S)                      | 53%  | 122   | 133  |
| (R)AARAPQPAGE(S)                        | 27%  | 124   | 133  |
| (E)SSSFPSYGK(N)                         | 16%  | 134   | 142  |
| (E)SSSFPSYGKNPGSR(R)                    | 99%  | 134   | 147  |
| (E)SSSFPSYGKNPGSR(R)                    | 99%  | 134   | 147  |
| (E)SSSFPSYGKNPGSR(R)                    | 97%  | 134   | 147  |
| (E)SSSFPSYGKNPGSRR(K)                   | 92%  | 134   | 148  |
| (E)SSSFPSYGKNPGSRR(K)                   | 70%  | 134   | 148  |
| (E)SSSFPSYGKNPGSRRKK(N)                 | 56%  | 134   | 150  |
| (E)SSSFPSYGKNPGSRRKK(N)                 | 11%  | 134   | 150  |
| (E)SSSFPSYGKNPGSRRKKNR(K)               | 10%  | 134   | 152  |
| (R)KATEENVTV(E)                         | 59%  | 153   | 162  |
| (S)EEEEENDSSDGFVTYKNE(F)                | 13%  | 174   | 191  |
| (E)EEEEENDSSDGFVTYKNE(F)                | 56%  | 176   | 191  |
| (E)ENDSSDGFVTYKNE(F)                    | 68%  | 178   | 191  |
| (E)NDSSDGFVTYKNE(F)                     | 100% | 179   | 191  |
| (E)NDSSDGFVTYKNE(F)                     | 100% | 179   | 191  |
| (E)NDSSDGFVTYKNE(F)                     | 99%  | 179   | 191  |
| (E)NDSSDGFVTYKNEFE(R)                   | 71%  | 179   | 193  |
| (N)DSSDGFVTYKNE(F)                      | 92%  | 180   | 191  |
| (D)SSDGFVTYKNE(F)                       | 99%  | 181   | 191  |
| (E)FEREEEE(T)                           | 90%  | 192   | 198  |
| (E)FEREEEEETGFE(L)                      | 100% | 192   | 202  |
| (E)FEREEEEETGFE(L)                      | 100% | 192   | 202  |
| (E)FEREEEEETGFE(L)                      | 99%  | 192   | 202  |
| (E)TGFELDK(K)                           | 90%  | 199   | 205  |
| (E)TGFELDK(L)                           | 78%  | 199   | 206  |
| (E)LDKKLGRPHPFIDPTK(K)                  | 30%  | 203   | 218  |
| (E)LDKKLGRPHPFIDPTKK(K)                 | 97%  | 203   | 219  |
| (E)LDKKLGRPHPFIDPTKK(K)                 | 37%  | 203   | 219  |
| (E)LDKKLGRPHPFIDPTKKK(Q)                | 99%  | 203   | 220  |
| (E)LDKKLGRPHPFIDPTKKK(Q)                | 75%  | 203   | 220  |
| (E)LDKKLGRPHPFIDPTKKK(Q)                | 72%  | 203   | 220  |
| (E)LDKKLGRPHPFIDPTKKK(Q)                | 57%  | 203   | 220  |
| (E)LDKKLGRPHPFIDPTKKK(Q)                | 31%  | 203   | 220  |
| (E)LDKKLGRPHPFIDPTKKKQIE(K)             | 99%  | 203   | 223  |
| (E)LDKKLGRPHPFIDPTKKKQIE(K)             | 98%  | 203   | 223  |

|                                    |      |     |     |
|------------------------------------|------|-----|-----|
| (E)LDKKLGRPHPFIDPTKKKQIE(K)        | 98%  | 203 | 223 |
| (E)LDKKLGRPHPFIDPTKKKQIE(K)        | 97%  | 203 | 223 |
| (E)LDKKLGRPHPFIDPTKKKQIE(K)        | 97%  | 203 | 223 |
| (E)LDKKLGRPHPFIDPTKKKQIE(K)        | 97%  | 203 | 223 |
| (E)LDKKLGRPHPFIDPTKKKQIE(K)        | 96%  | 203 | 223 |
| (E)LDKKLGRPHPFIDPTKKKQIE(K)        | 96%  | 203 | 223 |
| (E)LDKKLGRPHPFIDPTKKKQIE(K)        | 92%  | 203 | 223 |
| (E)LDKKLGRPHPFIDPTKKKQIE(K)        | 82%  | 203 | 223 |
| (E)LDKKLGRPHPFIDPTKKKQIE(K)        | 80%  | 203 | 223 |
| (E)LDKKLGRPHPFIDPTKKKQIE(K)        | 72%  | 203 | 223 |
| (E)LDKKLGRPHPFIDPTKKKQIE(K)        | 65%  | 203 | 223 |
| (E)LDKKLGRPHPFIDPTKKKQIE(K)        | 47%  | 203 | 223 |
| (E)LDKKLGRPHPFIDPTKKKQIE(K)        | 32%  | 203 | 223 |
| (E)LDKKLGRPHPFIDPTKKKQIE(K)        | 23%  | 203 | 223 |
| (E)LDKKLGRPHPFIDPTKKKQIEK(T)       | 43%  | 203 | 224 |
| (E)LDKKLGRPHPFIDPTKKKQIEK(T)       | 29%  | 203 | 224 |
| (E)LDKKLGRPHPFIDPTKKKQIEK(T)SDE(S) | 36%  | 203 | 230 |
| (D)KKLGRPHPFIDPTKKKQIE(K)          | 100% | 205 | 223 |
| (D)KKLGRPHPFIDPTKKKQIE(K)          | 99%  | 205 | 223 |
| (D)KKLGRPHPFIDPTKKKQIE(K)          | 98%  | 205 | 223 |
| (D)KKLGRPHPFIDPTKKKQIE(K)          | 92%  | 205 | 223 |
| (K)KLGRPHPFIDPTKKKQIE(K)           | 88%  | 206 | 223 |
| (K)KLGRPHPFIDPTKKKQIE(K)           | 75%  | 206 | 223 |
| (K)LGRPHPFIDPTKKKQIE(K)            | 98%  | 207 | 223 |
| (K)LGRPHPFIDPTKKKQIE(K)            | 97%  | 207 | 223 |
| (G)RPHPFIDPTKKKQIE(K)              | 60%  | 209 | 223 |
| (K)QIEK(T)SDE(S)                   | 21%  | 221 | 230 |
| (E)SWWNWRKPE(K)                    | 97%  | 231 | 239 |
| (E)SWWNWRKPE(K)                    | 91%  | 231 | 239 |
| (E)SWWNWRKPEKE(Q)                  | 95%  | 231 | 241 |
| (E)SWWNWRKPEKE(Q)                  | 36%  | 231 | 241 |
| (E)SWWNWRKPEKE(Q)                  | 28%  | 231 | 241 |
| (E)TVFLKAmAE(T)                    | 99%  | 255 | 263 |
| (E)TVFLKAmAE(T)                    | 99%  | 255 | 263 |
| (E)TVFLKAmAE(T)                    | 98%  | 255 | 263 |
| (E)TVFLKAmAE(T)                    | 94%  | 255 | 263 |
| (E)TVFLKAmAE(T)                    | 75%  | 255 | 263 |
| (E)TVFLKAmAE(T)                    | 64%  | 255 | 263 |
| (E)TVFLKAmAE(T)                    | 61%  | 255 | 263 |
| (E)TVFLKAmAE(T)                    | 61%  | 255 | 263 |
| (E)TVFLKAmAE(T)                    | 40%  | 255 | 263 |
| (E)TVFLKAmAE(T)                    | 37%  | 255 | 263 |
| (E)TVFLKAmAE(T)                    | 31%  | 255 | 263 |
| (E)TVFLKAmAE(T)                    | 29%  | 255 | 263 |
| (E)TVFLKAmAE(T)                    | 20%  | 255 | 263 |
| (E)TVFLKAmAE(T)                    | 14%  | 255 | 263 |
| (E)TVFLKAmAE(T)                    | 13%  | 255 | 263 |
| (E)TGQVKLYGEEPTLTE(T)              | 100% | 264 | 278 |
| (E)TGQVKLYGEEPTLTE(T)              | 100% | 264 | 278 |
| (E)TGQVKLYGEEPTLTE(T)              | 99%  | 264 | 278 |
| (E)TGQVKLYGEEPTLTE(T)              | 84%  | 264 | 278 |
| (Q)VKLYGEEPTLTE(T)                 | 74%  | 267 | 278 |
| (E)TSLYRAR(R)                      | 90%  | 279 | 285 |
| (E)TSLYRAR(R)                      | 70%  | 279 | 285 |
| (E)TSLYRAR(R)HLFKEE(R)             | 30%  | 279 | 292 |
| (R)RHLFKEE(R)                      | 90%  | 286 | 292 |
| (R)RHLFKEE(R)                      | 84%  | 286 | 292 |
| (E)RLQAERE(R)                      | 85%  | 293 | 299 |
| (E)RERLAKEGPmAFYSE(W)              | 91%  | 298 | 312 |
| (E)RERLAKEGPmAFYSE(W)              | 17%  | 298 | 312 |
| (E)RERLAKEGPmAFYSE(W)              | 9%   | 298 | 312 |
| (E)RLAKEGPmAFYSE(W)                | 100% | 300 | 312 |
| (E)RLAKEGPmAFYSE(W)                | 99%  | 300 | 312 |
| (E)RLAKEGPmAFYSE(W)                | 77%  | 300 | 312 |
| (E)RLAKEGPmAFYSE(W)                | 24%  | 300 | 312 |
| (E)RLAKEGPmAFYSE(W)                | 14%  | 300 | 312 |
| (E)RLAKEGPmAFYSE(W)                | 11%  | 300 | 312 |
| (R)LAKEGPmAFYSE(W)                 | 22%  | 301 | 312 |
| (E)GPmAFYSE(W)                     | 77%  | 305 | 312 |
| (E)GPmAFYSE(W)                     | 16%  | 305 | 312 |
| (E)WVKAWKRD(T)                     | 13%  | 313 | 320 |
| (R)EAVQKHFEETGEDE(N)               | 36%  | 324 | 337 |
| (E)AVQKHFEET(T)                    | 90%  | 325 | 332 |
| (E)AVQKHFEETGEDE(N)                | 100% | 325 | 337 |
| (E)AVQKHFEETGEDE(N)                | 90%  | 325 | 337 |
| (E)AVQKHFEETGEDE(N)                | 82%  | 325 | 337 |
| (E)AVQKHFEETGEDE(N)                | 78%  | 325 | 337 |
| (E)AVQKHFEETGEDE(N)                | 9%   | 325 | 337 |
| (E)AVQKHFEETGEDENTQLIE(M)          | 26%  | 325 | 343 |

|                                     |      |     |     |
|-------------------------------------|------|-----|-----|
| (K)HFEETGEDE(N)                     | 86%  | 329 | 337 |
| (E)NTQLIEmFSHQTDRE(Y)               | 100% | 338 | 352 |
| (E)NTQLIEmFSHQTDRE(Y)               | 100% | 338 | 352 |
| (E)NTQLIEmFSHQTDRE(Y)               | 98%  | 338 | 352 |
| (E)NTQLIEmFSHQTDRE(Y)               | 67%  | 338 | 352 |
| (E)MFSHQTDRE(Y)                     | 100% | 344 | 352 |
| (E)MFSHQTDRE(Y)                     | 100% | 344 | 352 |
| (E)mFSHQTDRE(Y)                     | 100% | 344 | 352 |
| (E)mFSHQTDRE(Y)                     | 100% | 344 | 352 |
| (E)MFSHQTDRE(Y)                     | 100% | 344 | 352 |
| (E)MFSHQTDRE(Y)                     | 99%  | 344 | 352 |
| (E)MFSHQTDRE(Y)                     | 99%  | 344 | 352 |
| (E)mFSHQTDRE(Y)                     | 98%  | 344 | 352 |
| (E)mFSHQTDRE(Y)                     | 98%  | 344 | 352 |
| (E)mFSHQTDRE(Y)                     | 96%  | 344 | 352 |
| (E)mFSHQTDRE(Y)                     | 96%  | 344 | 352 |
| (E)mFSHQTDRE(Y)                     | 76%  | 344 | 352 |
| (E)MFSHQTDRE(Y)                     | 74%  | 344 | 352 |
| (E)YRImMGTD(I)                      | 77%  | 353 | 360 |
| (E)DQIKQIWGGD(P)                    | 98%  | 375 | 384 |
| (E)DQIKQIWGGDPVYPTINYIQD(P)         | 71%  | 375 | 395 |
| (D)PVYPTINYIQDPNAVmD(F)             | 95%  | 385 | 401 |
| (N)YIQDPNAVMDFRGPDFHEPTPNMLSYLKE(N) | 16%  | 392 | 420 |
| (D)PNAVmDFRGPDFHEPTPNMLSYLKE(N)     | 53%  | 396 | 420 |
| (D)PNAVmDFRGPDFHEPTPNmLSYLKE(N)     | 43%  | 396 | 420 |
| (D)PNAVMDFRGPDFHEPTPNMLSYLKE(N)     | 28%  | 396 | 420 |
| (D)PNAVmDFRGPDFHEPTPNMLSYLKE(N)     | 7%   | 396 | 420 |
| (D)FRGPDFHEPTPNmLSYLKE(N)           | 100% | 402 | 420 |
| (D)FRGPDFHEPTPNMLSYLKE(N)           | 100% | 402 | 420 |
| (D)FRGPDFHEPTPNmLSYLKE(N)           | 100% | 402 | 420 |
| (D)FRGPDFHEPTPNmLSYLKE(N)           | 81%  | 402 | 420 |
| (D)FRGPDFHEPTPNMLSYLKE(N)           | 43%  | 402 | 420 |
| (D)FRGPDFHEPTPNmLSYLKE(N)           | 35%  | 402 | 420 |
| (N)MLSYLKE(N)                       | 56%  | 414 | 420 |
| (E)NGKVISREmHE(A)                   | 41%  | 421 | 431 |
| (E)mHEALLTKE(K)                     | 17%  | 429 | 437 |
| (E)ALLTKEKTE(Q)                     | 100% | 432 | 440 |
| (E)ALLTKEKTE(Q)                     | 100% | 432 | 440 |
| (E)ALLTKEKTE(Q)                     | 95%  | 432 | 440 |
| (A)LLTKEKTE(Q)                      | 97%  | 433 | 440 |
| (L)LTKEKTE(Q)                       | 90%  | 434 | 440 |
| (E)KTEQLEVPmD(D)                    | 85%  | 438 | 448 |
| (E)KVPRNWSVLK(E)                    | 25%  | 475 | 484 |
| (E)KVPRNWSVLKE(T)                   | 98%  | 475 | 485 |
| (E)KVPRNWSVLKE(T)                   | 53%  | 475 | 485 |
| (E)KVPRNWSVLKETPE(L)                | 99%  | 475 | 488 |
| (E)KVPRNWSVLKETPE(L)                | 96%  | 475 | 488 |
| (E)KVPRNWSVLKETPE(L)                | 35%  | 475 | 488 |
| (E)KVPRNWSVLKETPE(L)                | 21%  | 475 | 488 |
| (E)KVPRNWSVLKETPE(L)                | 13%  | 475 | 488 |
| (E)KVPRNWSVLKETPE(L)                | 13%  | 475 | 488 |
| (E)KVPRNWSVLKETPE(L)                | 11%  | 475 | 488 |
| (E)KVPRNWSVLKETPE(L)                | 10%  | 475 | 488 |
| (E)KVPRNWSVLKETPE(L)                | 8%   | 475 | 488 |
| (R)NWSVLKE(T)                       | 78%  | 479 | 485 |
| (R)NWSVLKETPE(L)                    | 84%  | 479 | 488 |
| (R)NWSVLKETPE(L)                    | 47%  | 479 | 488 |
| (W)SVLKETPE(L)                      | 9%   | 481 | 488 |
| (E)TPELRTAKPKPKKE(G)                | 24%  | 486 | 499 |
| (E)LRTAKPKPKKE(G)                   | 99%  | 489 | 499 |
| (E)LRTAKPKPKKE(G)                   | 52%  | 489 | 499 |
| (E)LRTAKPKPKKEGR(M)                 | 91%  | 489 | 501 |
| (E)GRMSLDEAVDD(A)                   | 59%  | 500 | 510 |
| (E)GRmSLDEAVDDAE(N)                 | 67%  | 500 | 512 |
| (E)GRMSLDEAVDDAE(N)                 | 57%  | 500 | 512 |
| (E)GRmSLDEAVDDAENLDFLmDFE(E)        | 62%  | 500 | 522 |
| (E)AVDDAENLDFLmDFEEEE(T)            | 31%  | 507 | 524 |
| (E)AVDDAENLDFLmDFEEEE(T)            | 22%  | 507 | 524 |

**Supplemental Table 2.** Oligonucleotides used for generating constructs used in this study.

| Construct      | Vector         | Forward Primer                                 | Reverse Primer                     | Template           | Cloning Method   |
|----------------|----------------|------------------------------------------------|------------------------------------|--------------------|------------------|
| N20-YFP        | pCHF3-YFP      | GGCggatccATGGCGTCAATATCAACCAC                  | GGCgtcgacTCCACTGTCTGTGCATACTTG     | AT2G34640 (HMR)    | PCR and Ligation |
| N31-YFP        | pCHF3-YFP      | GGCggatccATGGCGTCAATATCAACCAC                  | GGCgtcgacAACCCGTCTCTGCACAATAC      | AT2G34640 (HMR)    | PCR and Ligation |
| N50-YFP        | pCHF3-YFP      | GGCggatccATGGCGTCAATATCAACCAC                  | GGCgtcgacAGACCGATCCCTAGAAGTAATC    | AT2G34640 (HMR)    | PCR and Ligation |
| N60-YFP        | pCHF3-YFP      | GGCggatccATGGCGTCAATATCAACCAC                  | GGCgtcgacCTCTTTCTTGCAATTGATAC      | AT2G34640 (HMR)    | PCR and Ligation |
| YFP-GUS        | pCHF3-NtermYFP | CGGagatctATGTTACGTCCTGTAGAAAC                  | CGGggatccTTGTTTGCCTCCCTGCTGCG      | GUS                | PCR and Ligation |
| YG-NLS1        | pCHF3-YFP-GUS  | CGGagatctAAAAAGCTTGGAAGGCCACAT                 | CGGgtcgacTTAGTTCCACCACGATTCATCGCT  | AT2G34640 (HMR)    | PCR and Ligation |
| YG-NLS2        | pCHF3-YFP-GUS  | CGGagatctAAGACACTCACGAGCGATGAATCG              | CGGgtcgacTTAAACATCAGGACGTCTTCTTTG  | AT2G34640 (HMR)    | PCR and Ligation |
| YG-2NLS        | pCHF3-YFP-GUS  | CGGagatctAAAAAGCTTGGAAGGCCACAT                 | CGGgtcgacTTAAACATCAGGACGTCTTCTTTG  | AT2G34640 (HMR)    | PCR and Ligation |
| GST-HMRm       | pET42b         | GGCgaattcTAAGAAAGAGGATGGAGATGGTG               | GGCctgcagTTAAGGATCAGTCTCCTCTTCAAAG | AT2G34640 (HMR)    | PCR and Ligation |
| HMRm-HA        | pCHF3          | cccggggatcctctagagATGAAGAAAGAGGATGGAGATGGTGATG | cgaaagctctgcaggTTAGGCGGCCGGAGCGTA  | HMR-HA             | Gibson Assembly  |
| TPrbcS-HMRm-HA | pCHF3          | cccggggatcctctagagATGGCTTCCTCTATGCTC           | cttctctcatAGTCTCAAACCTCTTCTTTCC    | AT1G67090 (RBCS1A) | Gibson Assembly  |
|                |                | ttagactATGAAGAAAGAGGATGGAGATGGTGATG            | cgaaagctctgcaggTTAGGCGGCCGGAGCGTA  | HMR-HA             | Gibson Assembly  |
| YG             | pCHF3-YFP-GUS  | gatccTAATACCCATACGATGTTCCAGATg                 | tcgacATCTGGAACATCGTATGGGTATTA      | -                  | Adapter Ligation |
| YG-NLS SV40    | pCHF3-YFP-GUS  | gatccCCTAAGAAGAAGCGCAAGGTCTAAg                 | tcgacTTAGACCTTGCCTTCTTCTTAGGg      | -                  | Adapter Ligation |

**Supplemental Table 3.** Primers used for cDNA synthesis and qRT-PCR analysis of PEP-dependent plastidial genes.

| <b>Accession</b> | <b>Gene Name</b> | <b>cDNA Synthesis Primer</b> | <b>Primer Pair for qRT-PCR</b>                   |
|------------------|------------------|------------------------------|--------------------------------------------------|
| ATCG00630        | PSAJ             | GGGAAATGTTAATGCATCTGG        | AAACATATCTTTCCGTAGCAC<br>CTCTATTAATAAACCTGCTAACG |
| ATCG00020        | PSBA             | TAGATGGAGCCTCAACAGCAGCTA     | ACATTTCTTCTTAGCGGCTT<br>CGTCCTTGACTATCAACTACTGA  |
| ATCG00680        | PSBB             | CATCCAAATCTGGATCAATACCAG     | GAATTAGATCGTGCGACTTTGA<br>CTAGCACCATGCCAAATGTGTC |
| ATCG00490        | RBCL             | CTTCACAAGCAGCAGCTAGTTCAGG    | GGAGATGATTCTGTACTACAAT<br>GTCCCTCATTACGAGCTTGTAC |

**Supplemental Table 4.** Primers used for qRT-PCR analysis of nuclear-encoded genes.

| <b>Accession</b> | <b>Gene Name</b> | <b>Forward Primer</b>     | <b>Reverse Primer</b>     |
|------------------|------------------|---------------------------|---------------------------|
| AT1G69960        | PP2A             | TATCGGATGACGATTCTTCGTGCAG | GCTTGGTCGACTATCGGAATGAGAG |
| AT2G38530        | LTP2             | GCATGCAAAGTCAATATTCC      | AATATTCGAAACATCCGCTA      |
| AT5G14180        | MPL1             | TCAGCTACGGTGGTTTAGAT      | TTCACAAACTGCACATTCAT      |
| AT2G45210        | SAUR36           | G TTCAGGATACAACCGGATA     | TTGAGTTTGGCTAATGGTCT      |
| AT1G19530        | -                | CAAGTTGGTAACTCAGGAAGGTG   | TTCTCCACCATCCACTACTCTTG   |
| AT2G46970        | PIL1             | AAATTGCTCTCAGCCATTCGTGG   | TTCTAAGTTT GAGGCGGACGCAG  |
| AT4G16780        | ATHB-2           | TCACAGTACTCTCAATCCGAAGC   | CCGTAAGAACTCGCAGTCTAC     |
| AT4G32280        | IAA29            | CACCATCATTGCCCGTATCA      | CCACAGTAGCCGTTGTTGGA      |
| AT4G14130        | XTR7             | CACCGTCACTGCTTACTACTTG    | CATTGGTGTGAAGAACATAAG     |
